# Supplementary material for: Quality indicators for the primary care of osteoarthritis: a systematic review
Source: HighWire-hosted journal article supplement (doi:10.1136/annrheumdis-2013-203913), 2013-11-29
Supplement: annrheumdis-2013-203913supp_figureS2.pdf [file annrheumdis-2013-203913supp_figureS2.pdf]

**Quality Indicators for the Primary Care of Osteoarthritis: a Systematic Review**

**PRISMA 2009 Reporting Tool**

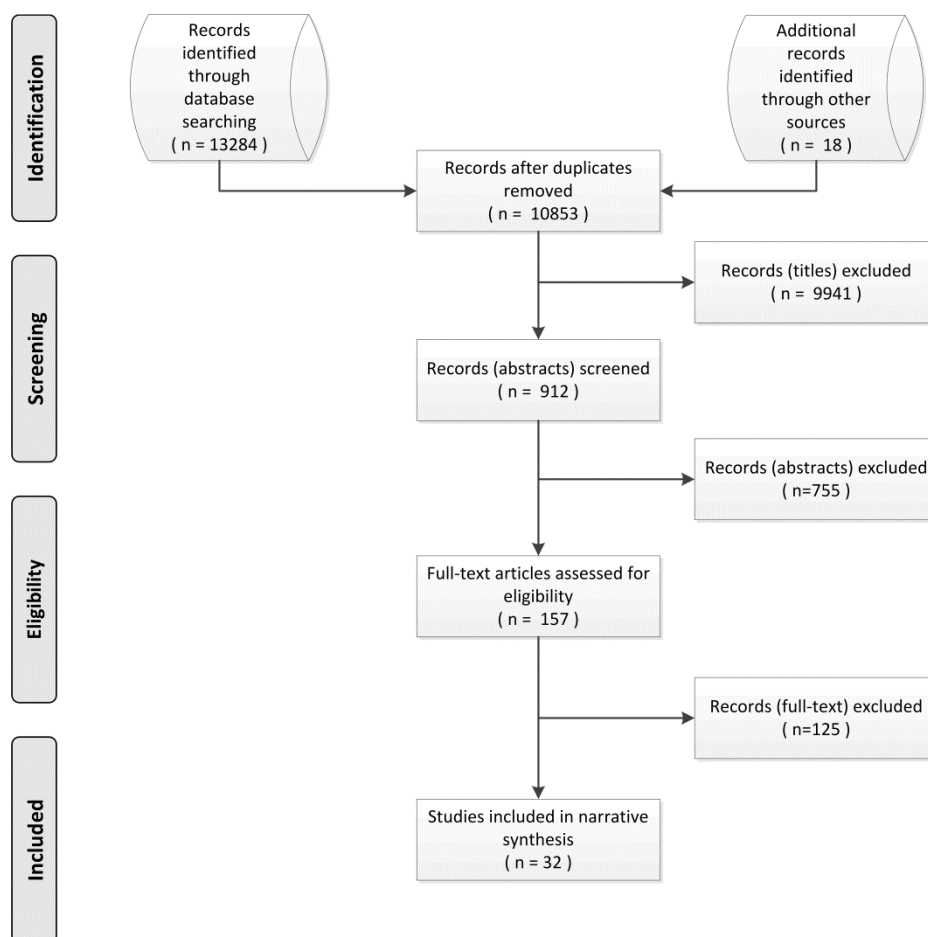

\*Full-text articles excluded: reasons

None of these articles developed, tested, or implemented quality indicators for OA

|                            |    |                     |    |
|----------------------------|----|---------------------|----|
| Abstract only              | 2  | Guideline adherence | 15 |
| Assessment study           | 1  | Intervention study  | 5  |
| Audit                      | 2  | Letter              | 2  |
| Clinical guideline         | 17 | News article        | 1  |
| Clinical standards         | 2  | Non-OA indicators   | 6  |
| Dataset                    | 4  | Other               | 1  |
| Editorial                  | 5  | Pain study          | 1  |
| Education article          | 3  | Qualitative study   | 1  |
| Education study            | 1  | Review article      | 31 |
| Epidemiology study         | 8  | Survey              | 16 |
| Patient expectations study | 1  |                     |    |

Moher D, Liberati A, Tetzlaff J, Altman DG, The PRISMA Group (2009). Preferred Reporting Items for Systematic Reviews and Meta-Analyses: The PRISMA Statement. PLoS Med 6(6): e1000097. doi:10.1371/journal.pmed1000097
